# Supplementary material for: Aroma Profile Development in Beer Fermented with Azacca, Idaho-7, and Sultana Hops
Source: MDPI journal article supplement (doi:10.3390/molecules28155802), 2023-08-01
Supplement: s1 [file s1]

## Supplementary Information

**Table S1.** Aroma ‘Check All That Apply’ (CATA) Options in Draught Lab Pro App

| First Selection | Second Selection                                                                                                                                                                                                                                                                                                                                                                                                                                                                                                                                                                                                                                                                                                                                                                                                                                                                                                                                                                                                                                                                                                                                                                                                                                                                                                                                                                                                                                                                                                                                                                                                                                                                                                                                                                                                                                                                                                                                                                                                                                                                                                                                                                                                                                                                                                                                                                | Third Selection                                                                                                                                                     |
|-----------------|---------------------------------------------------------------------------------------------------------------------------------------------------------------------------------------------------------------------------------------------------------------------------------------------------------------------------------------------------------------------------------------------------------------------------------------------------------------------------------------------------------------------------------------------------------------------------------------------------------------------------------------------------------------------------------------------------------------------------------------------------------------------------------------------------------------------------------------------------------------------------------------------------------------------------------------------------------------------------------------------------------------------------------------------------------------------------------------------------------------------------------------------------------------------------------------------------------------------------------------------------------------------------------------------------------------------------------------------------------------------------------------------------------------------------------------------------------------------------------------------------------------------------------------------------------------------------------------------------------------------------------------------------------------------------------------------------------------------------------------------------------------------------------------------------------------------------------------------------------------------------------------------------------------------------------------------------------------------------------------------------------------------------------------------------------------------------------------------------------------------------------------------------------------------------------------------------------------------------------------------------------------------------------------------------------------------------------------------------------------------------------|---------------------------------------------------------------------------------------------------------------------------------------------------------------------|
| Chemical        | 2-Acetyl Pyridine (Biscuit), 4-Ethyl Guaiacol (Medicinal, Spicy, Clove, Burnt, Smoke, Burnt Rubber), 4-Ethyl Phenol (medicinal, band-aid, earthy, barnyard, plastic), 4-Vinyl Guaiacol (spicy, sweet aromatic, clove, burnt, smoke, vanilla), Acetaldehyde (vegetal, paint, green leaves, green apple, grassy, solvent, fruity), Acetic Acid (vinegar, solvent), Acetylpyridine (cereal, biscuit, popcorn), Benzaldehyde (Marzipan, Cherry, Woody, Sweet Aromatic, Burnt Sugar, Nutty, Almond), Butyric Acid (dairy, sewage, sweat, butter, cheese, fruity), Caprylic Acid (waxy, fat, vegetable oil), Catty (Black currant/catty, fruity), Chlorophenol (medicinal, antiseptic), cis-3-hexanal (green leaves, grassy, watermelon, fresh cut grass, fruity), cis-3-hexanol (waxy, banana, cucumber, vegetal, green leaves, grassy, fresh cut grass, fruity), citric acid (sour), citronellol (lychee, rose, citronella, lime), damascenone (dried fruit, woody, sweet aromatic, stewed apple, strawberry rhubarb, herbaceous, black currant/catty, raspberry, peach, earthy, dry leaves, solvent, tobacco, menthol, honey, fruity, cooked fruit), diacetyl (butterscotch, dairy, butter, buttermilk, earthy, mold), dimethyl sulfide (vegetal, onion, tomato paste, canned corn, baked beans, cooked cabbage), ethyl acetate (solvent, fruity), ethyl butyrate (sweet aromatic, pineapple, bubble gum, fruity, artificial fruit), ethyl hexanoate (waxy, fat, licorice, spicy, green apple, solvent, fruity), geosmin (vegetal, soil, earthy), geraniol (rose, lime, geranium, lemon, floral, fruity, hyacinth), Guaiacol (smoke), Hydrogen sulfide (boiled egg), indole (fecal, cheese), isoamyl acetate (banana, solvent, fruity), isovaleric acid (dairy, cheese), kerosine (geranium, floral, petroleum, solvent), lactic acid (sour), limonene (orange, grassy), linalool (orange, grassy), mercaptan (boiled egg, vegetal, drains), methional (vegetal, cooked potato), myrcene (medicinal, resinous, woody, spicy, vegetal, geranium, herbaceous, pine, lemon, floral, grassy, celery, carrot, plastic, fruity, balsamic, black pepper), styrene (medicinal, plastic), sulfur dioxide (struck match, burnt), trans-2-nonenal (stale, waxy, fat, tallow, cardboard, cucumber, vegetal, paper), trichloroanisole (earthy, musty, mold), vanillin (sweet aromatic, vanilla) | N/A                                                                                                                                                                 |
| Fruity          | <p>Citrus</p> <p>Tropical</p> <p>Stone Fruit</p>                                                                                                                                                                                                                                                                                                                                                                                                                                                                                                                                                                                                                                                                                                                                                                                                                                                                                                                                                                                                                                                                                                                                                                                                                                                                                                                                                                                                                                                                                                                                                                                                                                                                                                                                                                                                                                                                                                                                                                                                                                                                                                                                                                                                                                                                                                                                | <p>Grapefruit, orange, lemon, lime</p> <p>Mango, pineapple, papaya, banana, lychee, guava, passionfruit, coconut</p> <p>Peach, apricot, nectarine, cherry, plum</p> |

|                |                                                                                                                                                                                  |                                                                                                                   |
|----------------|----------------------------------------------------------------------------------------------------------------------------------------------------------------------------------|-------------------------------------------------------------------------------------------------------------------|
|                | Berry                                                                                                                                                                            | Raspberry, Strawberry, Blueberry, Blackberry, Concord grape, Muscat grape, Gooseberry, Black Currant, Red Currant |
|                | Pomme                                                                                                                                                                            | Green apple, red apple, pear, cider                                                                               |
|                | Melon                                                                                                                                                                            | Cantaloupe, honeydew, cucumber, watermelon                                                                        |
|                | Dried Fruit                                                                                                                                                                      | Prune, fig, date, raisin                                                                                          |
| Floral         | Geranium, rose, citronella, lavender, lilac, chamomile, honeysuckle, jasmine, lily, violet, perfume                                                                              | N/A                                                                                                               |
| Sweet Aromatic | Caramel, honey, toffee, chocolate, brown sugar, burnt sugar, molasses, vanilla, bubble gum, frosting, marshmallow, pie crust, maple syrup, cola                                  | N/A                                                                                                               |
| Spicy          | Black pepper, white pepper, nutmeg, allspice, clove, juniper, licorice, coriander, cinnamon, ginger, caraway                                                                     | N/A                                                                                                               |
| Herbaceous     | Black tea, green tea, mint, rosemary, dill, thyme                                                                                                                                | N/A                                                                                                               |
| Grassy         | Fresh cut grass, lemongrass, green leaves, hay, dry leaves                                                                                                                       | N/A                                                                                                               |
| Earthy         | Musty, soil, barnyard, marsh/moss, mushroom, beet                                                                                                                                | N/A                                                                                                               |
| Woody          | Pine, resinous, cedar, tobacco, sandalwood, eucalyptus, spruce, oak                                                                                                              | N/A                                                                                                               |
| Nutty          | Walnut, almond, peanut, hazelnut                                                                                                                                                 | N/A                                                                                                               |
| Cereal         | Grainy, white bread, white cracker, bread dough, graham cracker, breakfast cereal, biscuit, toast, corn chip                                                                     | N/A                                                                                                               |
| Burnt          | Coffee, smoke, struck match                                                                                                                                                      | N/A                                                                                                               |
| Stale          | Leather, paper, cardboard, waxy, goat hair, wet dog, meaty/soy sauce, mousy                                                                                                      | N/A                                                                                                               |
| Dairy          | Butter, butterscotch, sour milk, cheese, yogurt                                                                                                                                  | N/A                                                                                                               |
| Rotten         | Sweat, boiled egg, rotten garbage, fecal, baby vomit, rotten cheese, fish, lightstruck/skunky, rotten vegetable                                                                  | N/A                                                                                                               |
| Vegetal        | Onion, green onion, fried onion, green bell pepper, garlic, canned corn, tomato paste, cooked cabbage, celery, carrot, cooked potato, baked beans, black olive, cooked vegetable | N/A                                                                                                               |
| Medicinal      | Band-aid, plastic, shower curtain, antiseptic, garden hose, cough syrup                                                                                                          | N/A                                                                                                               |
| Solvent        | Vinegar, paint thinner, nail polish remover, petroleum/diesel                                                                                                                    | N/A                                                                                                               |
| Alcoholic      | Sherry, red wine, white wine, rum, whiskey                                                                                                                                       | N/A                                                                                                               |
| Metallic       | Metallic                                                                                                                                                                         | N/A                                                                                                               |
